# Supplementary material for: Signaling protein signature predicts clinical outcome of non-small-cell lung cancer
Source: Springer Nature journal article supplement (doi:10.1186/s12885-018-4104-4), 2018-03-06
Supplement: MOESM1 [file 15513452]

# **Signaling protein signature predicts clinical outcome of non-small-cell lung cancer**

Bao-Feng Jin, Fan Yang, Xiao-Min Ying, Lin Gong, Shuo-Feng Hu, Qing Zhao, Yan-Hong Tai, Yi-Da Liao, Ke-Zhong Chen, Yuan Cao, Teng Li, Xiao Li, Yan-Huang, Xiao-Yan Zhan, Xuan-He Qin, Jin Wu, Shuai Chen, Sai-Sai Guo, Yu-Cheng Zhang, Jing Chen, Dan-Hua Shen, Kun-Kun Sun, Lu Chen, Wei-Hua Li, Ai-Ling Li, Na Wang, Qing Xia, Jun Wang, Tao Zhou

## **Seven additional figures and six additional tables**

**Figure S1.** Schematic diagram of IHC marker selection.

**Figure S2.** Prognosis classification according to the 6-protein ADC and 5-protein SCC signatures within each stage (stage I, II or IIIA)

**Figure S3.** Analysis of adjuvant chemotherapy benefit to patients within different stages based on 6-protein ADC signature.

**Figure S4.** Analysis of adjuvant chemotherapy benefit based on the 5-protein squamous cell carcinoma (SCC) signature.

**Figure S5.** Analysis of adjuvant chemotherapy benefit to patients within different stages based on 5-protein SCC signature.

**Figure S6.** ROC curves of the prognostic accuracy of the ADC signature and each protein in the signature in the ADC training set.

**Figure S7.** ROC curves of the prognostic accuracy of the SCC signature and each protein in the signature in the SCC training set.

**Table S1.** Proteins tested via immunohistochemistry on tissue microarrays in this study.

**Table S2.** Scaling coefficients of the ADC model.

**Table S3.** Support vectors and related coefficients of the ADC model.

**Table S4.** Scaling coefficients of the SCC model.

**Table S5.** Support vectors and related coefficients of the SCC model.

**Table S6.** Signature proteins and their related pathways or functions in tumor progression.

## **Additional methods**

Data process of missing values

The ADC prognostic model

The SCC prognostic model

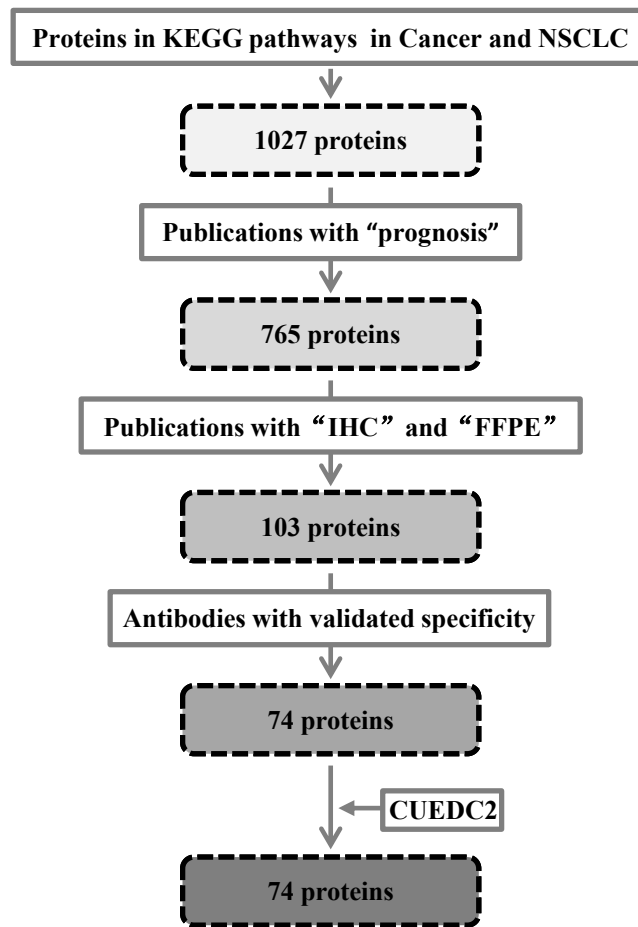

**Figure S1.** Schematic diagram of IHC marker selection.

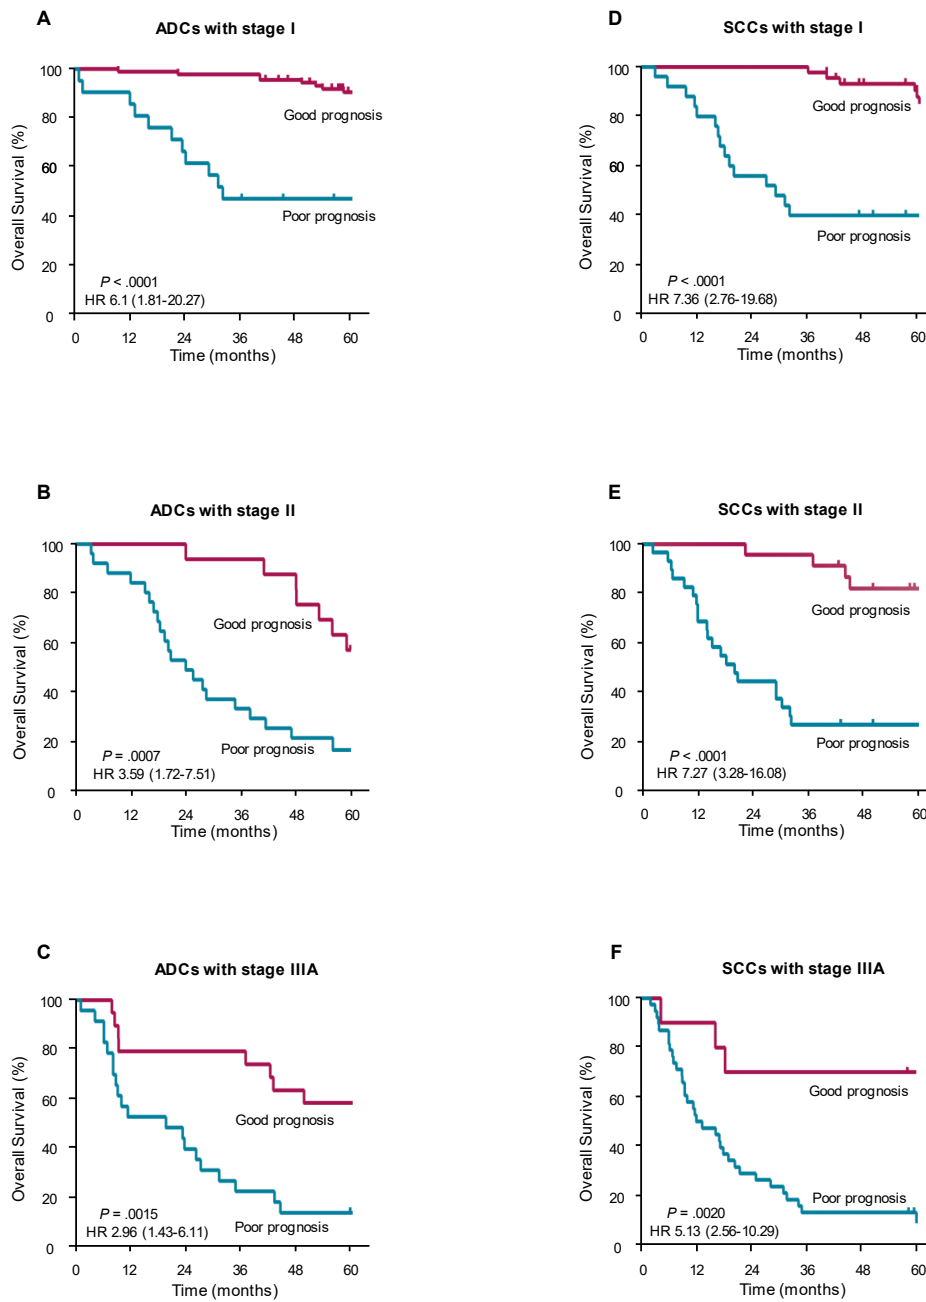

Fig S2. Prognosis classification according to the 6-protein ADC and 5-protein SCC signatures within each stage (stage I, II or IIIA).

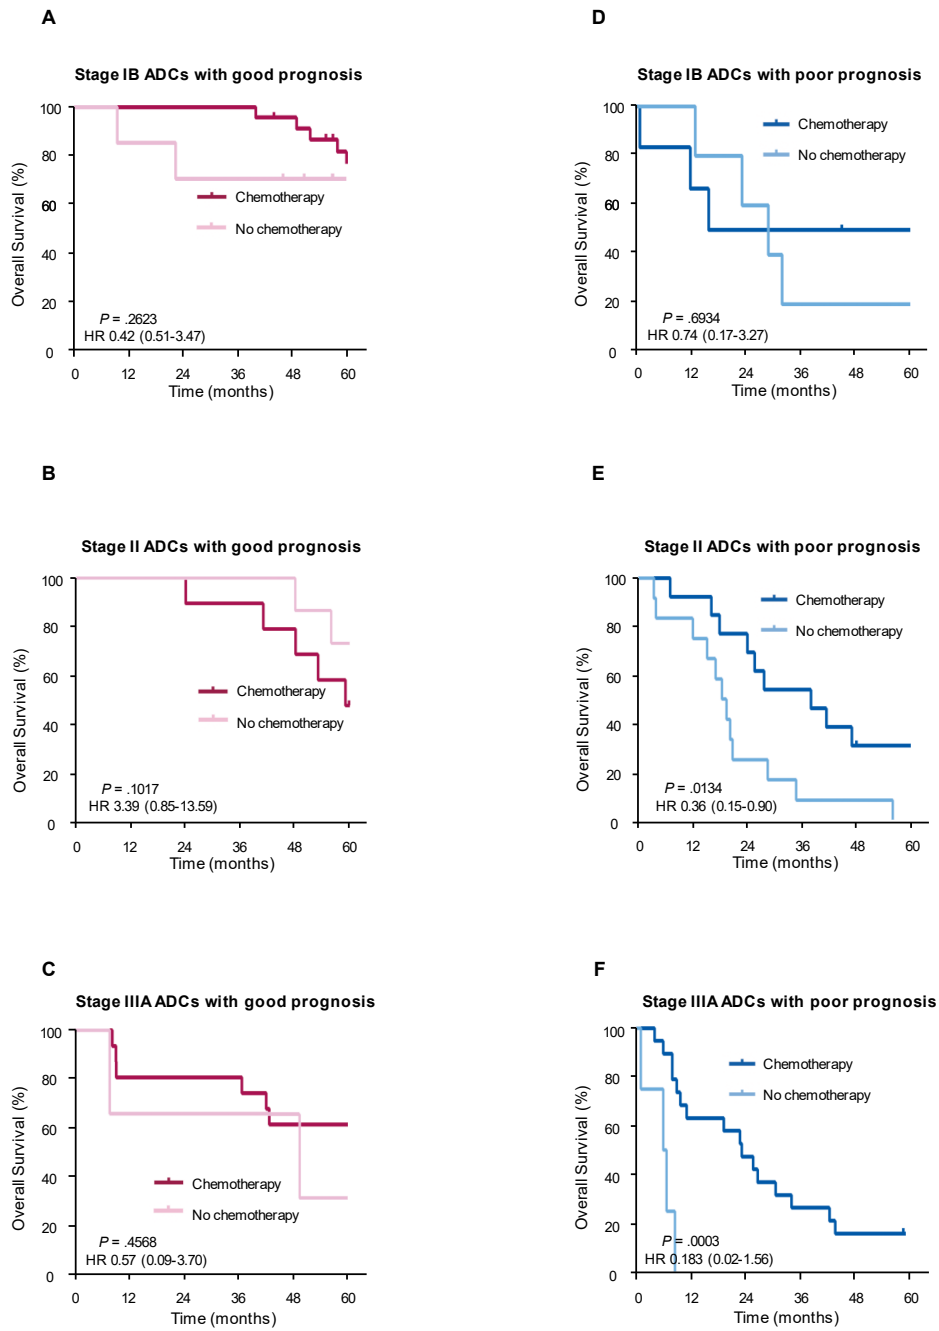

Fig S3. Analysis of adjuvant chemotherapy benefit to patients within different stages based on 6-protein ADC signature.

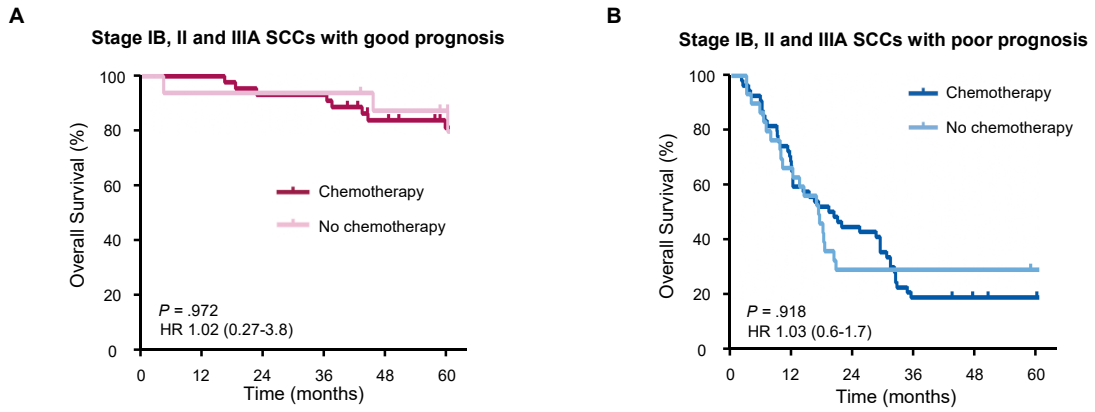

**Figure S4.** Analysis of adjuvant chemotherapy benefit based on the 5-protein squamous cell carcinoma (SCC) signature. The overall survival of the patients with or without adjuvant chemotherapy in the good-prognosis (A) and poor-prognosis (B) group was analyzed.

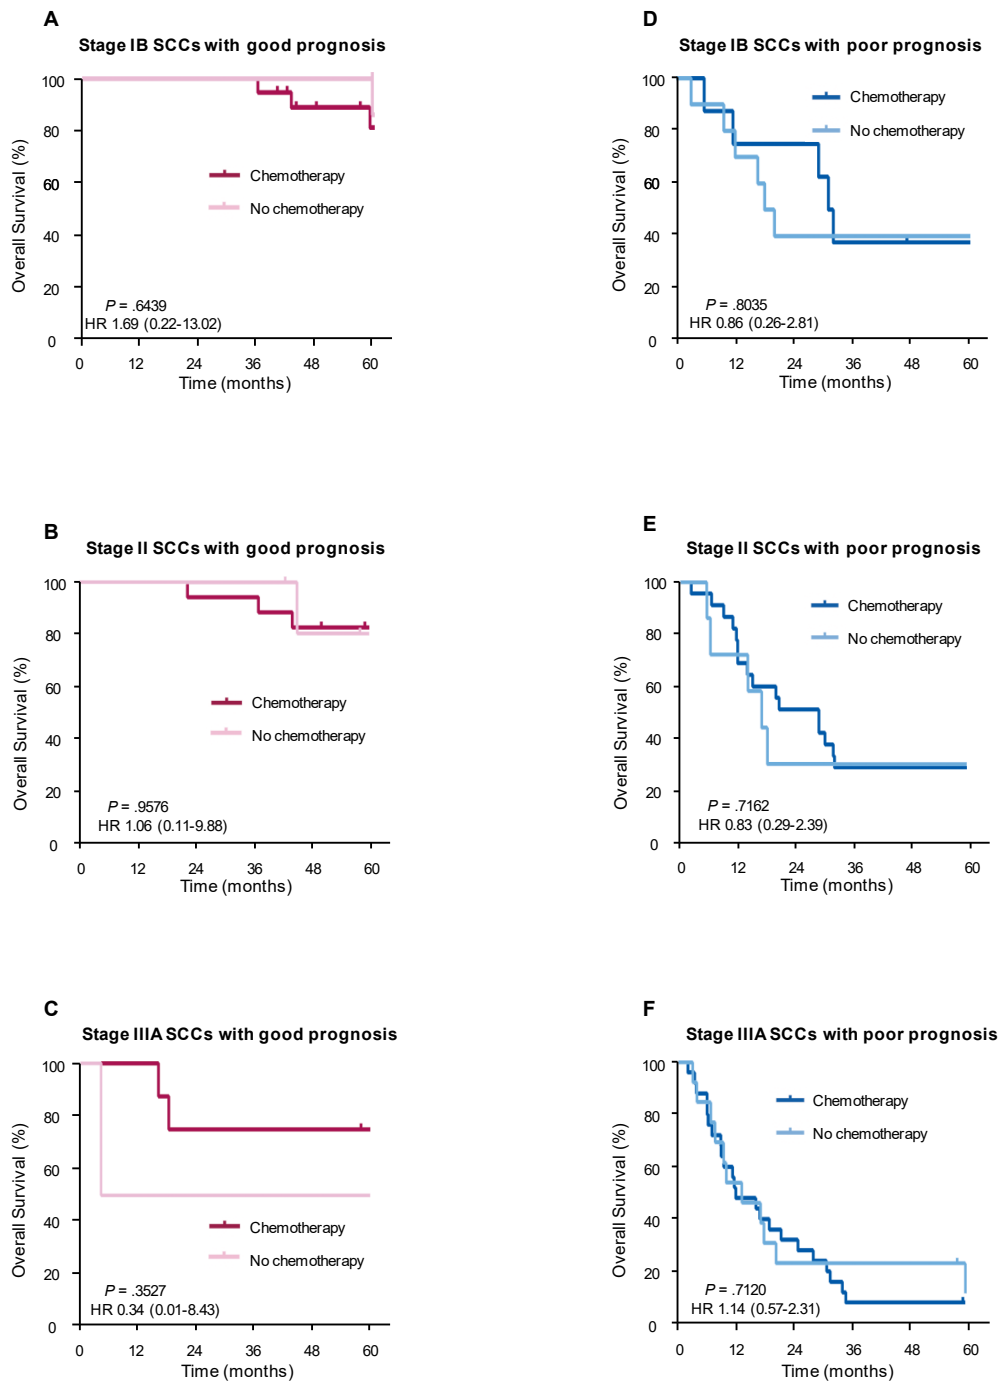

Fig S5. Analysis of adjuvant chemotherapy benefit to patients within different stages based on 5-protein SCC signature.

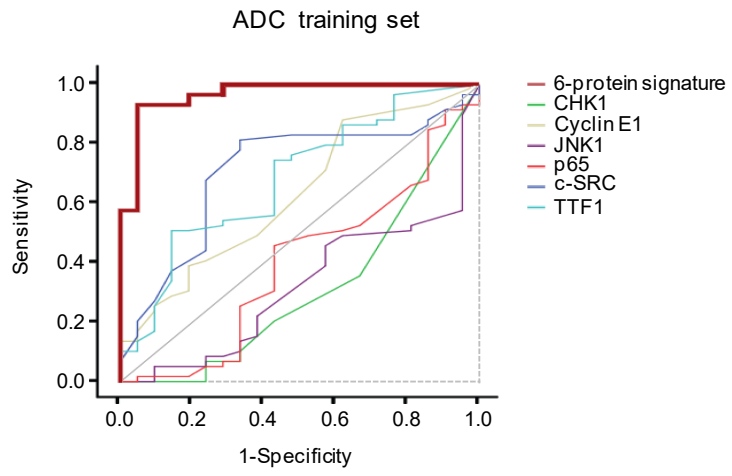

**Figure S6.** ROC curves of the prognostic accuracy of the ADC signature and each protein in the signature in the ADC training set.

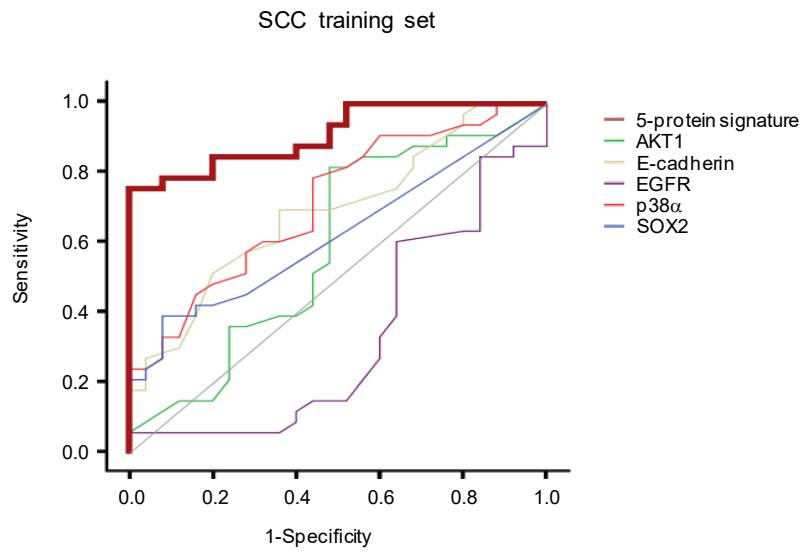

**Figure S7.** ROC curves of the prognostic accuracy of the SCC signature and each protein in the signature in the SCC training set.



**Table S1.** Proteins tested via immunohistochemistry on tissue microarrays in this study.

| Protein            | Ab   | Provider    | Cat. #        | Retrieval | Dilution | Localization                | References |
|--------------------|------|-------------|---------------|-----------|----------|-----------------------------|------------|
| AKT1               | Rmab | Epitomics   | #1085-1       | Citrate   | 1/2500   | whole cell*                 | [1]        |
| pAKT1 (S473)       | Rmab | CST         | #4060         | Citrate   | 1/50     | whole cell                  | [2]        |
| pAMPKa (T172)      | Rmab | CST         | #2535         | Citrate   | 1/50     | whole cell                  | [3]        |
| pAurora B (T232)   | Rpab | Rockland    | 600-401-677S  | Citrate   | 1/200    | nucleus                     | [4]        |
| ALK                | Rmab | CST         | #3633         | EDTA      | 1/100    | cell membrane,<br>cytoplasm | [5,6]      |
| Aurora A           | Rmab | Epitomics   | #1800-1       | Citrate   | 1/50     | whole cell                  | [7]        |
| BAX                | Rmab | CST         | #5023         | Citrate   | 1/200    | whole cell                  | [8]        |
| BCL-2              | Rmab | Epitomics   | #1017-1       | Citrate   | 1/200    | cytoplasm                   | [9–12]     |
| BCL-xl/BCL2L1      | Rmab | CST         | #2764         | Citrate   | 1/100    | mitochondria                | [13,14]    |
| β-catenin          | Rmab | CST         | #8480         | Citrate   | 1/150    | mainly cytoplasm            | [15]       |
| Caspase-3          | Rmab | Epitomics   | #1475-1       | Citrate   | 1/200    | cytoplasm                   | [16]       |
| Caspase-8          | Rmab | Epitomics   | #3614-1       | Citrate   | 1/300    | cytoplasm                   | [17]       |
| CDH1/FZR1          | Mmab | Abnova      | H00051343-M02 | Citrate   | 1/400    | nucleus                     | [18]       |
| CDK1/CDC2          | Rmab | Epitomics   | #3787-1       | Citrate   | 1/100    | whole cell                  | [19,20]    |
| CHK1/CHEK1         | Mmab | CST         | #2360         | Citrate   | 1/100    | nucleus                     | [21]       |
| CHK2               | Mmab | CST         | #3440         | Citrate   | 1/2000   | nucleus                     | [22]       |
| c-Kit/CD117        | Rmab | Epitomics   | #1522-1       | Citrate   | 1/100    | cell membrane,<br>cytoplasm | [23,24]    |
| c-MET              | Rmab | Epitomics   | #1996-1       | Citrate   | 1/400    | cell membrane               | [25–27]    |
| c-MYC              | Rmab | Epitomics   | #1472-1       | Citrate   | 1/100    | nucleus                     | [28–30]    |
| COX2               | Rpab | CST         | #4842         | Citrate   | 1/200    | whole cell                  | [31]       |
| c-SRC              | Rmab | CST         | #2109         | EDTA      | 1/1000   | mainly cytoplasm            | [32]       |
| CUEDC2             | Mmab | Homemade    | c5-19         | NO        | 1/800    | whole cell                  | [33]       |
| CXCR4              | Rmab | Epitomics   | #3108-1       | EDTA      | 1/100    | cell membrane,<br>cytoplasm | [34]       |
| Cyclin D1/CCND1    | Rmab | Epitomics   | #2261-1       | Citrate   | 1/150    | nucleus                     | [35,36]    |
| Cyclin E1/CCNE1    | Rpab | Abnova      | PAB4852       | Citrate   | 1/100    | nucleus                     | [37]       |
| DCLK1              | Rmab | Epitomics   | #3842-1       | Citrate   | 1/100    | cytoplasm                   | [38]       |
| DDR1               | Rmab | CST         | #5583         | Citrate   | 1/1600   | cell membrane,<br>cytoplasm | [39–41]    |
| DNA-PK/PRKDC       | Rmab | Epitomics   | #1579-1       | Citrate   | 1/100    | nucleus                     | [42,43]    |
| E-cadherin/CDH1    | Mmab | BD          | 610182        | Citrate   | 1/300    | cell junction               | [44–46]    |
| pERK1/2(T202/T204) | Rmab | CST         | #4376         | Citrate   | 1/200    | whole cell                  | [47]       |
| EGFR               | Rmab | Epitomics   | #1902-1       | NO        | 1/100    | cell membrane               | [48]       |
| EGFR (ΔE746-A750)  | Rmab | CST         | #2085         | EDTA      | 1/100    | cell membrane               | [49]       |
| EGFR (L858R)       | Rmab | CST         | #3197         | EDTA      | 1/100    | cell membrane               | [50]       |
| ErbB2/HER2         | Rmab | Epitomics   | #2064-1       | NO        | 1/50     | cell membrane               | [51]       |
| FGFR1              | Rmab | CST         | #9740         | EDTA      | 1/150    | cell membrane,<br>cytoplasm | [52,53]    |
| pFOXO3A (S253)     | Rpab | Abnova      | PAB16950      | Citrate   | 1/100    | mainly nucleus              | [54]       |
| pGSK-3β (S9)       | Rmab | Epitomics   | #2435-1       | Citrate   | 1/100    | whole cell                  | [55]       |
| HDAC2              | Rpab | Epitomics   | #S2398        | Citrate   | 1/100    | nucleus                     | [56,57]    |
| HDAC3              | Rpab | Abcam       | ab16047       | Citrate   | 1/100    | nucleus                     | [58,59]    |
| HIF-1α             | Rmab | Epitomics   | #2015-1       | Citrate   | 1/200    | nucleus                     | [60–62]    |
| HSP90              | Rpab | CST         | #4875         | EDTA      | 1/50     | cytoplasm                   | [63–65]    |
| JNK/JNK1/MAPK8     | Mmab | BD          | 51-1570GR     | Citrate   | 1/100    | whole cell                  | [66]       |
| pJNK (T183/T185)   | Mmab | Santa Cruz  | sc-6254       | Citrate   | 1/200    | whole cell                  | [67,68]    |
| pJAK2 (Y1007)      | Rmab | Epitomics   | #1477-1       | Citrate   | 1/150    | mainly nucleus              | [69,70]    |
| LKB1/STK11         | Rpab | Proteintech | 10746-1-AP    | Citrate   | 1/100    | whole cell                  | [71]       |
| LSD1/AOF2          | Mmab | CST         | #4064         | Citrate   | 1/100    | nucleus                     | [72–74]    |
| MAD2               | Rpab | Epitomics   | #S0224        | EDTA      | 1/300    | nucleus                     | [75–77]    |
| MDM2               | Rpab | Epitomics   | #S1357        | NO        | 1/200    | whole cell                  | [78–80]    |
| mTOR               | Rmab | Epitomics   | #1612-1       | Citrate   | 1/200    | mainly cytoplasm            | [81,82]    |
| pmTOR (S2448)      | Rmab | Epitomics   | #2936-1       | Citrate   | 1/100    | whole cell                  | [83]       |
| NF-κB/p65          | Rmab | Epitomics   | #1546-1       | Citrate   | 1/400    | cytoplasm, nucleus          | [84,85]    |
| p16/INK4a          | Rmab | Epitomics   | #3562-1       | Citrate   | 1/200    | whole cell                  | [86,87]    |
| p300/KAT3B         | Mmab | Abcam       | ab54984       | Citrate   | 1/3000   | nucleus                     | [88]       |

(continued on next page)

| Protein              | Ab   | Provider   | Cat. #   | Retrieval | Dilution | Localization                | References |
|----------------------|------|------------|----------|-----------|----------|-----------------------------|------------|
| p38 $\alpha$ /MAPK14 | Rpab | Santa Cruz | sc-535   | Citrate   | 1/100    | whole cell                  | [89]       |
| p53                  | Mmab | Santa Cruz | sc-126   | Citrate   | 1/150    | nucleus                     | [90–93]    |
| p53BP1               | Mmab | BD         | 612523   | Citrate   | 1/100    | nucleus                     | [94]       |
| PAK1                 | Rpab | CST        | #2602    | EDTA      | 1/150    | mainly cytoplasm            | [95]       |
| PDGFR $\alpha$       | Rpab | CST        | #3164    | EDTA      | 1/100    | cell membrane,<br>cytoplasm | [96]       |
| PI3K p110 $\alpha$   | Rmab | CST        | #4249    | Citrate   | 1/400    | mainly cytoplasm            | [97,98]    |
| PLK1                 | Rmab | Epitomics  | #6696-1  | Citrate   | 1/200    | mainly cytoplasm            | [99,100]   |
| PPAR $\gamma$ /PPARG | Rpab | Santa Cruz | sc-7196  | Citrate   | 1/100    | whole cell                  | [101–103]  |
| PTEN                 | Rmab | CST        | #9188    | Citrate   | 1/100    | mainly cytoplasm            | [104–106]  |
| pp21 (S146)          | Rmab | Epitomics  | #2674-1  | Citrate   | 1/400    | whole cell                  | [107,108]  |
| pPAK1 (S144)         | Rmab | Epitomics  | #1705-1  | Citrate   | 1/1000   | mainly cytoplasm            | [109]      |
| Raf1/c-Raf           | Rpab | Santa Cruz | sc-133   | Citrate   | 1/200    | cell membrane,<br>cytoplasm | [110,111]  |
| Rel B                | Mmab | Santa Cruz | sc-48366 | Citrate   | 1/100    | nucleus                     | [112]      |
| SKP2                 | Rpab | Santa Cruz | sc-7164  | Citrate   | 1/100    | nucleus                     | [113,114]  |
| pSTAT3 (Y705)        | Rmab | Epitomics  | #2236-1  | EDTA      | 1/100    | mainly nucleus              | [115,116]  |
| SLC2A1/GLUT1         | Rpab | Abnova     | PAB12031 | Citrate   | 1/800    | mainly cytoplasm            | [117,118]  |
| SMAD2/MADH2          | Rmab | CST        | #3122    | Citrate   | 1/100    | whole cell                  | [119]      |
| SOX2                 | Rmab | Epitomics  | #2696-1  | Citrate   | 1/50     | nucleus                     | [120–122]  |
| Survivin             | Rmab | CST        | #2808    | Citrate   | 1/400    | nucleus                     | [123,124]  |
| TTF1/NKX2.1          | Rmab | Epitomics  | #5883-1  | Citrate   | 1/500    | nucleus                     | [125]      |
| UBE2C/UBCH10         | Mmab | Abcam      | ab56861  | Citrate   | 1/150    | whole cell                  | [126]      |
| VEGFR2               | Rmab | CST        | #9698    | Citrate   | 1/1000   | cell membrane               | [127]      |

\* “whole cell” in localization column (column 7) denotes cell membrane, cytoplasm and nucleus.

**Table S2.** Scaling coefficients of the ADC model.

| <b>Protein</b> | <b>Lower</b> | <b>Upper</b> |
|----------------|--------------|--------------|
| CHK1           | -0.166273865 | 1.037846118  |
| Cyclin E1      | -0.498933141 | 0.823286154  |
| JNK1           | -0.694643566 | 0.584110035  |
| p65            | -1.246927602 | 0.237372238  |
| c-SRC          | -0.917718271 | 0.161462975  |
| TTF1           | -1.106011396 | 0.236411285  |

**Table S3.** Support vectors and related coefficients of the ADC model.

| No. | SV coefficient      | SV         |            |           |          |           |            |
|-----|---------------------|------------|------------|-----------|----------|-----------|------------|
|     |                     | CHK1       | Cyclin E1  | JNK1      | p65      | c-SRC     | TTF1       |
| 1   | 1.166529102994991   | -1         | -0.089319  | -0.529182 | -1       | 0.722452  | -1         |
| 2   | 8                   | -1         | -0.398073  | 0.0216394 | 0.980492 | 0.83288   | 0.773408   |
| 3   | 7.914210883170862   | -1         | -0.54466   | 0.321753  | 0.640482 | 0.580274  | 0.722452   |
| 4   | 6.420936990446873   | -1         | 0.177038   | 0.492457  | 0.859747 | 0.722452  | 0.0413561  |
| 5   | 5.721178217158177   | -1         | -1         | -0.529182 | 0.821980 | 0.722452  | 0.521412   |
| 6   | 6.751657750534642   | -0.707519  | -0.0119453 | 0.217046  | 0.723039 | 0.536913  | -0.551512  |
| 7   | 8                   | 0.0849625  | 0.177038   | 0.321753  | 0.781607 | 0.566184  | 0.851932   |
| 8   | 1.358361658604497   | 0.229716   | 0.443395   | 0.742233  | 0.80883  | 0.832880  | 0.634224   |
| 9   | 0.3683819003162858  | -0.5       | -1         | -1        | 0.738240 | 0.506537  | 0.557368   |
| 10  | 8                   | -1         | -0.544660  | 0.861706  | 0.821980 | 0.594427  | 0.777569   |
| 11  | 1.531517270194687   | -1         | 0.934253   | -0.377613 | 0.781607 | 0.768456  | 0.985125   |
| 12  | 1.367992469618161   | -1         | -0.398073  | -0.724589 | 0.795376 | 0.983055  | -0.737652  |
| 13  | 4.168716626409085   | -0.0465547 | -0.398073  | 0.217046  | 0.883636 | 0.853257  | -0.830242  |
| 14  | 0.05178166562459967 | -0.339036  | 0.323625   | -0.377613 | 0.723039 | 1         | 0.813861   |
| 15  | 6.027605190470098   | -0.5       | -0.733643  | -0.253771 | 0.252333 | 0.83288   | 0.712157   |
| 16  | 8                   | -0.707519  | -0.398073  | 0.321753  | 0.478017 | 0.853257  | 0.384689   |
| 17  | 6.911852250434124   | -0.707519  | -0.278302  | -0.253771 | 0.883636 | -0.262515 | 0.489844   |
| 18  | 1.247882046206535   | -1         | -0.278302  | -0.724589 | 0.544335 | 0.594427  | 0.384689   |
| 19  | 3.850457244809196   | -1         | -0.544660  | 0.321753  | 0.622475 | 0.407860  | 0.870160   |
| 20  | 8                   | -0.5       | -0.54466   | 0.687864  | 0.883636 | 0.722452  | -1         |
| 21  | 7.766849090380986   | -1         | -0.733643  | 0.816406  | 0.917734 | 0.873131  | 0.756491   |
| 22  | 6.980436885497707   | -0.5       | -0.398073  | -0.529182 | 0.723039 | 0.768456  | 0.938331   |
| 23  | 0.619650775859574   | -0.5       | -0.398073  | -0.724589 | 0.960311 | 0.698425  | 0.938331   |
| 24  | 0.1309579496779729  | -1         | -0.398073  | 0.217046  | 0.871813 | 0.698425  | 1          |
| 25  | -0.5460730718184561 | 0.850220   | -0.3980730 | 0.767868  | 0.928672 | 0.722452  | -1         |
| 26  | -8                  | -0.707519  | -0.278302  | 0.0932051 | 0.723039 | 0.832880  | 0.851932   |
| 27  | -0.8807924966875877 | 0.543731   | 0.0572679  | 0.0216394 | 0.738240 | 0.929968  | 0.730257   |
| 28  | -2.7642169646283490 | 0.584962   | -0.398073  | 0.839434  | 0.723039 | 0.853257  | -1         |
| 29  | -8                  | -1         | -0.733643  | 0.0216394 | 0.767505 | 0.83288   | 0.905143   |
| 30  | -6.456400904965796  | -0.707519  | 0.177038   | 1         | 0.707434 | 0.873131  | -1         |
| 31  | -8                  | -0.707519  | -0.278302  | 0.981886  | 0.285781 | 0.621713  | 0.259064   |
| 32  | -8                  | -0.5       | -0.733643  | 0.0216394 | 0.767505 | 0.621713  | 0.449808   |
| 33  | -0.8397050269053298 | -1         | -1         | 0.321753  | 0.970489 | 0.673658  | -1         |
| 34  | -8                  | -0.707519  | -1         | 0.839434  | 0.970489 | 0.673658  | 0.793951   |
| 35  | -8                  | -1         | -0.398073  | -0.253771 | 0.960311 | 0.722452  | 0.489844   |
| 36  | -8                  | -0.707519  | -0.733643  | 0.321753  | 0.753055 | 0.506537  | -1.000000  |
| 37  | -8                  | -1         | -0.177038  | 0.0216394 | 0.821980 | 0.594427  | -0.0268154 |
| 38  | -2.325671665357503  | -0.207519  | -0.398073  | 0.742233  | 0.970489 | 0.621713  | 0.489844   |
| 39  | -7.282395004410535  | 0.292481   | -0.0119453 | -0.253771 | 0.478017 | 0.648104  | 0.707552   |
| 40  | -8                  | -1         | -0.54466   | 0.321753  | 0.723039 | 0.621713  | 0.707552   |
| 41  | -5.057743931568415  | -1         | -0.278302  | -1        | 0.216857 | -0.185804 | 0.159324   |
| 42  | -8                  | -1         | 0.278302   | 0.492457  | 0.949954 | 0.536913  | 0.707552   |
| 43  | -4.203956902067077  | -0.207519  | -0.733643  | -0.253771 | 0.753055 | 0.648104  | 0.734704   |

**Table S4.** Scaling coefficients of the SCC model.

| <b>Protein</b> | <b>Lower</b> | <b>Upper</b> |
|----------------|--------------|--------------|
| AKT1           | -1.131249036 | 0.211173644  |
| E-cadherin     | -0.791163384 | 0.178873393  |
| EGFR           | -1.212120146 | 0.250277851  |
| p38 $\alpha$   | -0.970134933 | 0.352084361  |
| SOX2           | -0.650762327 | 0.639272285  |

**Table S5.** Support vectors and related coefficients of the SCC model.

| No. | SV coefficient      | SV         |            |           |              |           |
|-----|---------------------|------------|------------|-----------|--------------|-----------|
|     |                     | AKT1       | E-cadherin | EGFR      | p38 $\alpha$ | SOX2      |
| 1   | 0.8464156345297407  | -1         | 0.664493   | -1        | 0.405847     | -1        |
| 2   | 0.2124651100093301  | -0.0268154 | 0.57915    | -1        | 0.709752     | -1        |
| 3   | 0.7168128272667304  | 0.421672   | 0.823862   | -0.588306 | 0.278302     | 0.927139  |
| 4   | 1.185442908741702   | -1         | 0.843119   | 0.545863  | 0.478913     | 0.823348  |
| 5   | 2                   | 0.707552   | 0.898523   | 0.733005  | 0.98417      | -1        |
| 6   | 2                   | -1         | 0.664493   | 0.627918  | 0.733643     | -1        |
| 7   | 1.664321410011921   | 0.752192   | 0.916255   | 0.682783  | 0.951317     | -1        |
| 8   | 0.1954537223007999  | 0.730257   | 0.898523   | 0.682783  | 0.512608     | 0.982511  |
| 9   | 2                   | 0.730257   | 0.664493   | 0.567464  | 0.778966     | -1        |
| 10  | 2                   | 0.730257   | 0.49891    | 0.733005  | 0.366021     | -1        |
| 11  | 2                   | 0.259064   | 0.441121   | 0.567464  | -0.278302    | -1        |
| 12  | 2                   | 0.659602   | 0.49891    | 0.567464  | 1            | -1        |
| 13  | 2                   | 0.580274   | 0.823862   | 0.808289  | 0.278302     | -1        |
| 14  | 2                   | 0.607811   | 0.698717   | 0.733005  | 0.68496      | -1        |
| 15  | 2                   | 0.954308   | 0.950698   | 0.608442  | 0.443395     | 0.206404  |
| 16  | 2                   | 0.634224   | 0.553194   | 0.98967   | 0.733643     | 0.0836453 |
| 17  | 2                   | 0.345463   | 0.470481   | 1         | -0.398073    | -1        |
| 18  | 2                   | 0.684021   | 0.950698   | 0.545863  | 0.478913     | -1        |
| 19  | 2                   | 0.833177   | 0.57915    | 0.682783  | 0.861187     | -1        |
| 20  | 2                   | 0.833177   | 0.861971   | 0.7       | 0.632379     | -1        |
| 21  | 2                   | 0.634224   | -0.121747  | 0.523448  | 0.632379     | 0.0836453 |
| 22  | 2                   | 0.793951   | 0.843119   | 0.665051  | 0.478913     | -1        |
| 23  | 2                   | 0.887888   | 0.553194   | 0.7       | -0.0119453   | -0.533299 |
| 24  | -2                  | 0.887888   | 0.604375   | 0.8876    | 0.709752     | -1        |
| 25  | -0.7048208520469    | -1         | -1         | -0.455771 | -0.0119453   | -1        |
| 26  | -2                  | 0.92195    | 0.861971   | 0.911846  | 0.861187     | -1        |
| 27  | -2                  | 0.793951   | 0.933642   | 0.911846  | 0.733643     | -1        |
| 28  | -2                  | 0.954308   | 0.676046   | 0.83592   | -0.089319    | -1        |
| 29  | -2                  | 0.905143   | 0.843119   | 0.83592   | 0.323625     | 0.0127054 |
| 30  | -2                  | 0.793951   | 0.57915    | 0.608442  | 0.54466      | -1        |
| 31  | -2                  | 0.752192   | 0.57915    | 0.588306  | 0.756695     | -1        |
| 32  | -2                  | 0.707552   | 0.652788   | 0.979158  | 0.575219     | -0.533299 |
| 33  | -1.196660866524577  | 0.303705   | -0.542597  | -0.455771 | -0.0119453   | -1        |
| 34  | -2                  | 0.303705   | 0.823862   | 0.608442  | 0.512608     | -1        |
| 35  | -0.6884342289129464 | 0.0413561  | 0.49891    | 0.733005  | 0.366021     | -0.533299 |
| 36  | -2                  | -0.103025  | 0.698717   | 0.764273  | 0.68496      | -1        |
| 37  | -1.295112591246491  | 0.938331   | -0.542597  | 0.733005  | 0.68496      | -1        |
| 38  | -0.9318297032828035 | 0.345463   | 0.57915    | 0.8876    | 0.0572679    | -1        |
| 39  | -0.6982911187307125 | -1         | -0.861971  | 0.862322  | -0.54466     | -1        |
| 40  | -2                  | 0.384689   | 0.57915    | 0.748845  | 0.22962      | -1        |
| 41  | -2                  | 0.813861   | 0.470481   | 0.911846  | 0.88023      | -1        |
| 42  | -0.8260630063038303 | -0.103025  | 0.676046   | 0.0642127 | -1           | 0.356648  |

(continued on following page)

| No. | SV coefficient     | SV        |            |          |              |           |
|-----|--------------------|-----------|------------|----------|--------------|-----------|
|     |                    | AKT1      | E-cadherin | EGFR     | p38 $\alpha$ | SOX2      |
| 43  | -2                 | 0.259064  | 0.652788   | 0.748845 | 0.512608     | -0.383055 |
| 44  | -1.473497015010048 | -0.103025 | 0.861971   | 0.808289 | 0.366021     | -1        |
| 45  | -1.006202230801914 | -1        | 0.553194   | 0.7      | -0.54466     | -0.156506 |
| 46  | -2                 | 0.9699    | 0.698717   | 0.450628 | -0.278302    | 0.51581   |
| 47  | -2                 | 0.773408  | 0.49891    | 0.608442 | 0.278302     | -1        |

**Table S6.** Signature proteins and their related pathways or functions in tumor progression.

| Histology  | Proteins in signature | Aliases      | Reference sequence | Protein location | Relevant biological functions and pathways                                                                                                             |
|------------|-----------------------|--------------|--------------------|------------------|--------------------------------------------------------------------------------------------------------------------------------------------------------|
| <b>ADC</b> |                       |              |                    |                  |                                                                                                                                                        |
|            | c-SRC                 | SRC1         | NP_005408.1        | cytoplasm        | Gene transcription, immune response, cell adhesion, cell cycle progression, apoptosis, migration, and transformation                                   |
|            | Cyclin E1             | CCNE1        | NP_001229.1        | nucleus          | Essential for the control of the cell cycle at the G1/S (start) transition                                                                             |
|            | TTF1                  | NKX2.1       | NP_001192225.1     | nucleus          | Regulation of thyroid specific genes, maintenance of the thyroid differentiation phenotype, lung development and surfactant homeostasis                |
|            | p65                   | Rel A        | NP_001158884.1     | cytoplasm        | NF- $\kappa$ B pathway, involved in any biological processes such as inflammation, immunity, differentiation, cell growth, tumorigenesis and apoptosis |
|            | CHK1                  | CHEK1        | NP_001107593.1     | nucleus          | Checkpoint-mediated cell cycle arrest, S to G2/M phase transition and DNA repair.                                                                      |
|            | JNK1                  | MAPK8        | NP_001265476.1     | whole cell       | MAPK pathway, involved in various processes such as cell proliferation, differentiation, migration, transformation and programmed cell death           |
| <b>SCC</b> |                       |              |                    |                  |                                                                                                                                                        |
|            | EGFR                  | ERBB1        | NP_005219.2        | cell membrane    | Gene expression, cytoskeletal rearrangement, anti-apoptosis and increased cell proliferation                                                           |
|            | SOX2                  | ANOP3        | NP_003097.1        | nucleus          | Embryonic development, embryonic stem cell pluripotency, as a switch in neuronal development.                                                          |
|            | E-cadherin            | CDH1         | NP_004351.1        | cell junction    | Regulating cell-cell adhesions, mobility and proliferation of epithelial cells                                                                         |
|            | AKT1                  | PKB $\alpha$ | NP_001014431.1     | whole cell       | Regulating many processes including metabolism, proliferation, cell survival, growth and angiogenesis                                                  |
|            | p38 $\alpha$          | MAPK14       | NP_001306.1        | whole cell       | Involved in a wide variety of cellular processes such as proliferation, differentiation, transcription regulation and development                      |



## Methods

### Data process of missing values

After IHC staining and evaluation, protein expression profiles were obtained. In 211 tissue samples of BJ cohort, 75 proteins/phospho-proteins were detected. Two samples were removed because more than 1/3 proteins were not successfully detected, which resulted in 209 samples in BJ cohort. In 173 tissue samples of CQ cohort, 19 samples with more than 1 missing value were removed and 154 samples were left for further analysis. Among 15,675 expression values ( $209 \times 75$ ) of BJ cohort, there were 418 missing values. The missing value rate was 2.7% (418/15,675). Each sample has 2 missing values in average (418/209) in all 75 expression values. In 154 tissue samples of CQ cohort, 6 proteins for 72 ADC samples and 5 proteins for 82 SCC samples were detected. Among 842 expression values ( $72 \times 6 + 82 \times 5$ ), there were 21 missing values. The missing value rate was 2.5% (21/842). Missing values of BJ dataset were replaced with the median score of the respective protein in all tumors. For independent validation of CQ dataset, missing values were replaced with the median score of the corresponding protein in BJ dataset.

### The ADC prognostic model

Clinical implementation of the 6-protein ADC signature would be straightforward. For each ADC patient, IHC would be performed for the 6 signature proteins. After normalization, the expression levels of the 6 proteins would be scaled as:

$$f_s(x) = -1 + 2 \cdot (x - lower) / (upper - lower), \quad (1)$$

where  $x$  is the normalized expression level, and upper and lower for each protein are listed in Table S2. The probability of each patient would be calculated as:

$$prob(x) = \frac{1}{1 + \exp(-0.669914 \cdot f(x) - 0.468554)}, \quad (2)$$

where  $f(x)$  is calculated as:

$$f(x) = \sum_{i=1}^{43} sv\_coef(i) \cdot \exp(-0.5 \cdot \|SVs(i) - x\|^2) - 0.0192488. \quad (3)$$

In this equation,  $SVs(i)$  and  $sv\_coef(i)$  are support vectors and related coefficients (Table S3).

When the probability calculated is smaller than the preset threshold of 0.710, the patient is classified into poor-prognosis group; otherwise, the patient is classified into good-prognosis group.

### The SCC prognostic model

For each SCC patient, IHC would be performed for the 5 signature proteins. After normalization, the expression levels of the 5 proteins would be scaled as equation (1). The upper and lower for each protein are listed in Table S4.

The probability of each patient would be calculated as:

$$prob(x) = \frac{1}{1 + \exp(-0.313025 \cdot f(x) - 0.239983)}, \quad (4)$$

where  $f(x)$  is calculated as:

$$f(x) = \sum_{i=1}^{47} sv\_coef(i) \cdot \exp(-0.5 \cdot \|SVs(i) - x\|^2) + 0.195726. \quad (5)$$

In this equation,  $SVs(i)$  and  $sv\_coef(i)$  are support vectors and related coefficients (Table S5).

When the probability calculated is smaller than the preset threshold of 0.597, the patient is classified into poor-prognosis group; otherwise, the patient is classified into good-prognosis group.

## References

1. Feng M, Gao W, Wang R, Chen W, Man Y-G, Figg WD, et al. Therapeutically targeting glypican-3 via a conformation-specific single-domain antibody in hepatocellular carcinoma. *Proc. Natl. Acad. Sci.* 2013;110:E1083–91.
2. Chen M, Pratt CP, Zeeman ME, Schultz N, Taylor BS, O'Neill A, et al. Identification of PHLPP1 as a tumor suppressor reveals the role of feedback activation in PTEN-mutant prostate cancer progression. *Cancer Cell.* 2011;20:173–86.
3. Healy JE, Gearhart CN, Bateman JL, Handa RJ, Florant GL. AMPK and ACC change with fasting and physiological condition in euthermic and hibernating golden-mantled ground squirrels (*Callospermophilus lateralis*). *Comp. Biochem. Physiol. A. Mol. Integr. Physiol.* 2011;159:322–31.
4. Pannone G, Hindi S a. H, Santoro A, Sanguedolce F, Rubini C, Cincione RI, et al. Aurora B expression as a prognostic indicator and possible therapeutic target in oral squamous cell carcinoma. *Int. J. Immunopathol. Pharmacol.* 2011;24:79–88.
5. Mino-Kenudson M, Chirieac LR, Law K, Hornick JL, Lindeman N, Mark EJ, et al. A novel, highly sensitive antibody allows for the routine detection of ALK-rearranged lung adenocarcinomas by standard immunohistochemistry. *Clin. Cancer Res. Off. J. Am. Assoc. Cancer Res.* 2010;16:1561–71.
6. Ren H, Tan Z-P, Zhu X, Crosby K, Haack H, Ren J-M, et al. Identification of anaplastic lymphoma kinase as a potential therapeutic target in ovarian cancer. *Cancer Res.* 2012;72:3312–23.
7. Behnsawy HM, Miyake H, Abdalla MA, Sayed MA, Ahmed AE-FI, Fujisawa M. Expression of cell cycle-associated proteins in non-muscle-invasive bladder cancer: correlation with intravesical recurrence following transurethral resection. *Urol. Oncol.* 2011;29:495–501.
8. Weisberg E, Ray A, Nelson E, Adamia S, Barrett R, Sattler M, et al. Reversible resistance induced by FLT3 inhibition: a novel resistance mechanism in mutant FLT3-expressing cells. *PLoS One.* 2011;6:e25351.
9. Schuetz JM, Johnson NA, Morin RD, Scott DW, Tan K, Ben-Nierah S, et al. BCL2 mutations in diffuse large B-cell lymphoma. *Leukemia.* 2012;26:1383–90.
10. Bellas C, García D, Vicente Y, Kilany L, Abaira V, Navarro B, et al. Immunohistochemical and molecular characteristics with prognostic significance in diffuse large B-cell lymphoma. *PLoS One.* 2014;9:e98169.
11. Némati F, de Montrion C, Lang G, Kraus-Berthier L, Carita G, Sastre-Garau X, et al. Targeting Bcl-2/Bcl-XL induces antitumor activity in uveal melanoma patient-derived xenografts. *PLoS One.* 2014;9:e80836.
12. Cigna N, Farrokhi Moshai E, Brayer S, Marchal-Somme J, Wémeau-Stervinou L, Fabre A, et al. The hedgehog system machinery controls transforming growth factor- $\beta$ -dependent myofibroblastic differentiation in humans: involvement in idiopathic pulmonary fibrosis. *Am. J. Pathol.* 2012;181:2126–37.
13. Zinn RL, Gardner EE, Dobromilskaya I, Murphy S, Marchionni L, Hann CL, et al. Combination treatment with ABT-737 and chloroquine in preclinical models of small cell lung cancer. *Mol. Cancer.* 2013;12:16.
14. Barbone D, Ryan JA, Kolhatkar N, Chacko AD, Jablons DM, Sugarbaker DJ, et al. The Bcl-2 repertoire of mesothelioma spheroids underlies acquired apoptotic multicellular resistance. *Cell Death Dis.* 2011;2:e174.
15. Trautmann M, Sievers E, Aretz S, Kindler D, Michels S, Friedrichs N, et al. SS18-SSX fusion protein-induced Wnt/ $\beta$ -catenin signaling is a therapeutic target in synovial sarcoma. *Oncogene.* 2013; 33, 5006-5016
16. Abdi J, Mutis T, Garssen J, Redegeld F. Stimulation of Toll-like receptor-1/2 combined with Velcade increases cytotoxicity to human multiple myeloma cells. *Blood Cancer J.* 2013;3:e119.
17. Stutz N, Johnson RD, Wood GS. The Fas apoptotic pathway in cutaneous T-cell lymphomas: frequent expression of phenotypes associated with resistance to apoptosis. *J. Am. Acad. Dermatol.* 2012;67:1327.e1-10.
18. Hu K, Liao D, Wu W, Han A-J, Shi H-J, Wang F, et al. Targeting the anaphase-promoting complex/cyclosome (APC/C)-bromodomain containing 7 (BRD7) pathway for human osteosarcoma. *Oncotarget.* 2014;5:3088–100.
19. Palmer A, Gavin AC, Nebreda AR. A link between MAP kinase and p34(cdc2)/cyclin B during oocyte maturation: p90(rsk) phosphorylates and inactivates the p34(cdc2) inhibitory kinase Myt1. *EMBO J.* 1998;17:5037–47.

20. Ye XS, Fincher RR, Tang A, McNeal KK, Gyax SE, Wexler AN, et al. Proteolysis and tyrosine phosphorylation of p34cdc2/cyclin B. The role of MCM2 and initiation of DNA replication to allow tyrosine phosphorylation of p34cdc2. *J. Biol. Chem.* 1997;272:33384–93.
21. Leich E, Zamo A, Horn H, Haralambieva E, Puppe B, Gascoyne RD, et al. MicroRNA profiles of t(14;18)-negative follicular lymphoma support a late germinal center B-cell phenotype. *Blood.* 2011;118:5550–8.
22. Ehlen O, Nodin B, Rexhepaj E, Brandstedt J, Uhlen M, Alvarado-Kristensson M, et al. RBM3-Regulated Genes Promote DNA Integrity and Affect Clinical Outcome in Epithelial Ovarian Cancer. *Transl. Oncol.* 2011;4:212–21.
23. Wong NACS, Melegh Z. Antigen retrieval and primary antibody type affect sensitivity but not specificity of CD117 immunohistochemistry. *Histopathology.* 2009;54:529–38.
24. Rosenbaum ST, Svalø J, Nielsen K, Larsen T, Jørgensen JC, Bouchelouche P. Immunolocalization and expression of small-conductance calcium-activated potassium channels in human myometrium. *J. Cell. Mol. Med.* 2012;16:3001–8.
25. Jacobsen F, Ashtiani SN, Tennstedt P, Heinzer H, Simon R, Sauter G, et al. High c-MET expression is frequent but not associated with early PSA recurrence in prostate cancer. *Exp. Ther. Med.* 2013;5:102–6.
26. Terwisscha van Scheltinga AGT, Lub-de Hooge MN, Hinner MJ, Verheijen RB, Allersdorfer A, Hülsmeier M, et al. In vivo visualization of MET tumor expression and anticalin biodistribution with the MET-specific anticalin 89Zr-PRS-110 PET tracer. *J. Nucl. Med. Off. Publ. Soc. Nucl. Med.* 2014;55:665–71.
27. Ohe M, Yokose T, Sakuma Y, Miyagi Y, Okamoto N, Osanai S, et al. Stromal micropapillary component as a novel unfavorable prognostic factor of lung adenocarcinoma. *Diagn. Pathol.* 2012;7:3.
28. Toon CW, Chou A, Clarkson A, DeSilva K, Houang M, Chan JCY, et al. Immunohistochemistry for myc predicts survival in colorectal cancer. *PloS One.* 2014;9:e87456.
29. Sanz-Moreno A, Fuhrmann D, Wolf E, von Eyss B, Eilers M, Elsässer H-P. Miz1 deficiency in the mammary gland causes a lactation defect by attenuated Stat5 expression and phosphorylation. *PloS One.* 2014;9:e89187.
30. Hu S, Xu-Monette ZY, Tzankov A, Green T, Wu L, Balasubramanyam A, et al. MYC/BCL2 protein coexpression contributes to the inferior survival of activated B-cell subtype of diffuse large B-cell lymphoma and demonstrates high-risk gene expression signatures: a report from The International DLBCL Rituximab-CHOP Consortium Program. *Blood.* 2013;121:4021–4031; quiz 4250.
31. Al-Salihi MA, Pearman AT, Doan T, Reichert EC, Rosenberg DW, Prescott SM, et al. Transgenic expression of Cyclooxygenase-2 in mouse intestine epithelium is insufficient to initiate tumorigenesis but promotes tumor progression. *Cancer Lett.* 2009;273:225–32.
32. Tryfonopoulos D, Walsh S, Collins DM, Flanagan L, Quinn C, Corkery B, et al. Src: a potential target for the treatment of triple-negative breast cancer. *Ann. Oncol. Off. J. Eur. Soc. Med. Oncol. ESMO.* 2011;22:2234–40.
33. Pan X, Zhou T, Tai Y-H, Wang C, Zhao J, Cao Y, et al. Elevated expression of CUEDC2 protein confers endocrine resistance in breast cancer. *Nat. Med.* 2011;17:708–14.
34. Wheat R, Roberts C, Waterboer T, Steele J, Marsden J, Steven NM, et al. Inflammatory cell distribution in primary merkel cell carcinoma. *Cancers.* 2014;6:1047–64.
35. Feng Z, Guo W, Zhang C, Xu Q, Zhang P, Sun J, et al. CCND1 as a predictive biomarker of neoadjuvant chemotherapy in patients with locally advanced head and neck squamous cell carcinoma. *PloS One.* 2011;6:e26399.
36. Zhong L-P, Zhu D-W, William WN, Liu Y, Ma J, Yang C-Z, et al. Elevated cyclin D1 expression is predictive for a benefit from TPF induction chemotherapy in oral squamous cell carcinoma patients with advanced nodal disease. *Mol. Cancer Ther.* 2013;12:1112–21.
37. Kuhn E, Bahadirli-Talbott A, Shih I-M. Frequent CCNE1 amplification in endometrial intraepithelial carcinoma and uterine serous carcinoma. *Mod. Pathol. Off. J. U. S. Can. Acad. Pathol. Inc.* 2014;27:1014–9.
38. Roudier M, Coleman I, Zhang X, Coleman R, Chery L, Brown L, et al. Abstract 5122: Characterizing the molecular features of ERG positive tumors in primary and castration resistant prostate cancer. *Cancer Res.* 2013;73:5122–5122.
39. Gross O, Beirowski B, Harvey SJ, Mcfadden C, Chen D, Tam S, et al. DDR1-deficient mice show localized

- subepithelial GBM thickening with focal loss of slit diaphragms and proteinuria. *Kidney Int.* 2004;66:102–11.
40. Turashvili G, Bouchal J, Ehrmann J, Fridman E, Skarda J, Kolar Z. Novel immunohistochemical markers for the differentiation of lobular and ductal invasive breast carcinomas. *Biomed. Pap. Med. Fac. Univ. Palacký Olomouc Czechoslov.* 2007;151:59–64.
  41. Reichert-Faria A, Jung J e., Moreschi Neto V, Silva de Castro C c., Mira M t., Noronha L. Reduced immunohistochemical expression of Discoidin Domain Receptor 1 (DDR1) in vitiligo skin. *J. Eur. Acad. Dermatol. Venereol.* 2013;27:1057–9.
  42. DNA-PK, the DNA-activated protein kinase, is differentially expressed in normal and malignant human tissues. *Publ. Online* 20 May 1999 Doi101038sjonc1202640 [Internet]. 1999 [cited 2014 Sep 11];18. Available from: <http://www.nature.com/onc/journal/v18/n20/full/1202640a.html>
  43. Björk-Eriksson T, West C, Nilsson A, Magnusson B, Svensson M, Karlsson E, et al. The immunohistochemical expression of DNA-PKCS and Ku (p70/p80) in head and neck cancers: relationships with radiosensitivity. *Int. J. Radiat. Oncol. Biol. Phys.* 1999;45:1005–10.
  44. Liu M, Casimiro MC, Wang C, Shirley LA, Jiao X, Katiyar S, et al. p21CIP1 attenuates Ras- and c-Myc-dependent breast tumor epithelial mesenchymal transition and cancer stem cell-like gene expression in vivo. *Proc. Natl. Acad. Sci. U. S. A.* 2009;106:19035–9.
  45. Kotb AM, Hierholzer A, Kemler R. Replacement of E-cadherin by N-cadherin in the mammary gland leads to fibrocystic changes and tumor formation. *Breast Cancer Res. BCR.* 2011;13:R104.
  46. Haro E, Delgado I, Junco M, Yamada Y, Mansouri A, Oberg KC, et al. Sp6 and Sp8 Transcription Factors Control AER Formation and Dorsal-Ventral Patterning in Limb Development. *PLoS Genet.* 2014;10:e1004468.
  47. Frederick MJ, VanMeter AJ, Gadhikar MA, Henderson YC, Yao H, Pickering CC, et al. Phosphoproteomic analysis of signaling pathways in head and neck squamous cell carcinoma patient samples. *Am. J. Pathol.* 2011;178:548–71.
  48. Modena P, Buttarelli FR, Miceli R, Piccinin E, Baldi C, Antonelli M, et al. Predictors of outcome in an AIEOP series of childhood ependymomas: a multifactorial analysis. *Neuro-Oncol.* 2012;14:1346–56.
  49. Kato Y, Peled N, Wynes MW, Yoshida K, Pardo M, Mascaux C, et al. Novel epidermal growth factor receptor mutation-specific antibodies for non-small cell lung cancer: immunohistochemistry as a possible screening method for epidermal growth factor receptor mutations. *J. Thorac. Oncol. Off. Publ. Int. Assoc. Study Lung Cancer.* 2010;5:1551–8.
  50. Kato Y, Peled N, Wynes MW, Yoshida K, Pardo M, Mascaux C, et al. Novel epidermal growth factor receptor mutation-specific antibodies for non-small cell lung cancer: immunohistochemistry as a possible screening method for epidermal growth factor receptor mutations. *J. Thorac. Oncol. Off. Publ. Int. Assoc. Study Lung Cancer.* 2010;5:1551–8.
  51. Behnsawy HM, Miyake H, Abdalla MA, Sayed MA, Ahmed AE-FI, Fujisawa M. Expression of cell cycle-associated proteins in non-muscle-invasive bladder cancer: correlation with intravesical recurrence following transurethral resection. *Urol. Oncol.* 2011;29:495–501.
  52. Lin D-C, Hao J-J, Nagata Y, Xu L, Shang L, Meng X, et al. Genomic and molecular characterization of esophageal squamous cell carcinoma. *Nat. Genet.* 2014;46:467–73.
  53. Zhang J, Wu G, Miller CP, Tatevossian RG, Dalton JD, Tang B, et al. Whole-genome sequencing identifies genetic alterations in pediatric low-grade gliomas. *Nat. Genet.* 2013;45:602–12.
  54. Chatterjee A, Chatterjee U, Ghosh MK. Activation of protein kinase CK2 attenuates FOXO3a functioning in a PML-dependent manner: implications in human prostate cancer. *Cell Death Dis.* 2013;4:e543.
  55. Gobrecht P, Leibinger M, Andreadaki A, Fischer D. Sustained GSK3 activity markedly facilitates nerve regeneration. *Nat. Commun.* [Internet]. 2014 [cited 2014 Oct 9];5. Available from: <http://www.nature.com/ncomms/2014/140731/ncomms5561/full/ncomms5561.html>
  56. Colón-Díaz M, Báez-Vega P, García M, Ruiz A, Monteiro JB, Fourquet J, et al. HDAC1 and HDAC2 are differentially expressed in endometriosis. *Reprod. Sci. Thousand Oaks Calif.* 2012;19:483–92.

57. Trivedi CM, Luo Y, Yin Z, Zhang M, Zhu W, Wang T, et al. Hdac2 regulates the cardiac hypertrophic response by modulating Gsk3 $\beta$  activity. *Nat. Med.* 2007;13:324–31.
58. Wilson AJ, Byun D-S, Popova N, Murray LB, L'Italien K, Sowa Y, et al. Histone Deacetylase 3 (HDAC3) and Other Class I HDACs Regulate Colon Cell Maturation and p21 Expression and Are Deregulated in Human Colon Cancer. *J. Biol. Chem.* 2006;281:13548–58.
59. Minamiya Y, Ono T, Saito H, Takahashi N, Ito M, Motoyama S, et al. Strong expression of HDAC3 correlates with a poor prognosis in patients with adenocarcinoma of the lung. *Tumor Biol.* 2010;31:533–9.
60. Xiao H, Tong R, Cheng S, Lv Z, Ding C, Du C, et al. BAG3 and HIF-1  $\alpha$  coexpression detected by immunohistochemistry correlated with prognosis in hepatocellular carcinoma after liver transplantation. *BioMed Res. Int.* 2014;2014:516518.
61. Zeindl-Eberhart E, Brandl L, Liebmann S, Ormanns S, Scheel SK, Brabletz T, et al. Epithelial-mesenchymal transition induces endoplasmic-reticulum-stress response in human colorectal tumor cells. *PloS One.* 2014;9:e87386.
62. Chen L, Shi Y, Yuan J, Han Y, Qin R, Wu Q, et al. HIF-1 alpha overexpression correlates with poor overall survival and disease-free survival in gastric cancer patients post-gastrectomy. *PloS One.* 2014;9:e90678.
63. Sebastián R, Ventura MP, Solari HP, Anteck E, Orellana ME, Burnier MN. Immunohistochemical detection of Hsp90 and Ki-67 in pterygium. *Diagn. Pathol.* 2013;8:32.
64. Sebastián R, Ventura MP, Solari HP, Anteck E, Orellana ME, Jr MNB. Immunohistochemical detection of Hsp90 and Ki-67 in pterygium. *Diagn. Pathol.* 2013;8:1–7.
65. Pieper M, Rupprecht HD, Bruch KM, De Heer E, Schöcklmann HO. Requirement of heat shock protein 90 in mesangial cell mitogenesis. *Kidney Int.* 2000;58:2377–89.
66. Vivanco I, Palaskas N, Tran C, Finn SP, Getz G, Kennedy NJ, et al. Identification of the JNK Signaling Pathway as a Functional Target of the Tumor Suppressor PTEN. *Cancer Cell.* 2007;11:555–69.
67. Savage MJ, Lin Y-G, Ciallella JR, Flood DG, Scott RW. Activation of c-Jun N-terminal kinase and p38 in an Alzheimer's disease model is associated with amyloid deposition. *J. Neurosci. Off. J. Soc. Neurosci.* 2002;22:3376–85.
68. Gonzalo S, Grasa L, Hernández LV, Arruebo MP, Plaza MÁ, Murillo MD. Mitogen activated protein kinases blockade improves lipopolysaccharide-induced ileal motor disturbances. *Rev. Esp. Enfermedades Dig. Organo Of. Soc. Esp. Patol. Dig.* 2012;104:305–9.
69. Byrne R, Rath E, Hladik A, Niederreiter B, Bonelli M, Frantal S, et al. A dynamic real time in vivo and static ex vivo analysis of granulomonocytic cell migration in the collagen-induced arthritis model. *PloS One.* 2012;7:e35194.
70. Kirabo A, Park SO, Majumder A, Gali M, Reinhard MK, Wamsley HL, et al. The Jak2 inhibitor, G6, alleviates Jak2-V617F-mediated myeloproliferative neoplasia by providing significant therapeutic efficacy to the bone marrow. *Neoplasia N. Y. N.* 2011;13:1058–68.
71. Nakada Y, Stewart TG, Peña CG, Zhang S, Zhao N, Bardeesy N, et al. The LKB1 tumor suppressor as a biomarker in mouse and human tissues. *PloS One.* 2013;8:e73449.
72. Kong L, Zhang G, Wang X, Zhou J, Hou S, Cui W. Immunohistochemical expression of RBP2 and LSD1 in papillary thyroid carcinoma. *Romanian J. Morphol. Embryol. Rev. Roum. Morphol. Embryol.* 2013;54:499–503.
73. Metzger E, Wissmann M, Yin N, Müller JM, Schneider R, Peters AHFM, et al. LSD1 demethylates repressive histone marks to promote androgen-receptor-dependent transcription. *Nature.* 2005;437:436–9.
74. Wu Y, Wang Y, Yang XH, Kang T, Zhao Y, Wang C, et al. The Deubiquitinase USP28 Stabilizes LSD1 and Confers Stem-Cell-like Traits to Breast Cancer Cells. *Cell Rep.* 2013;5:224–36.
75. Furlong F, Fitzpatrick P, O'Toole S, Phelan S, McGrogan B, Maguire A, et al. Low MAD2 expression levels associate with reduced progression-free survival in patients with high-grade serous epithelial ovarian cancer. *J. Pathol.* 2012;226:746–55.
76. Park PE, Jeong JY, Kim SZ, Park JY. MAD2 Expression in Ovarian Carcinoma: Different Expression Patterns and

- Levels among Various Types of Ovarian Carcinoma and Its Prognostic Significance in High-Grade Serous Carcinoma. *Korean J. Pathol.* 2013;47:418.
77. Kato T, Daigo Y, Aragaki M, Ishikawa K, Sato M, Kondo S, et al. Overexpression of MAD2 predicts clinical outcome in primary lung cancer patients. *Lung Cancer.* 2011;74:124–31.
  78. Aleixo PB, Hartmann AA, Menezes IC, Meurer RT, Oliveira AM. Can MDM2 and CDK4 make the diagnosis of well differentiated/dedifferentiated liposarcoma? An immunohistochemical study on 129 soft tissue tumours. *J. Clin. Pathol.* 2009;62:1127–35.
  79. Thway K, Flora R, Shah C, Olmos D, Fisher C. Diagnostic utility of p16, CDK4, and MDM2 as an immunohistochemical panel in distinguishing well-differentiated and dedifferentiated liposarcomas from other adipocytic tumors. *Am. J. Surg. Pathol.* 2012;36:462–9.
  80. Dujardin F, Binh MBN, Bouvier C, Gomez-Brouchet A, Larousserie F, Muret A de, et al. MDM2 and CDK4 immunohistochemistry is a valuable tool in the differential diagnosis of low-grade osteosarcomas and other primary fibro-osseous lesions of the bone. *Mod. Pathol.* 2011;24:624–37.
  81. Yu G, Wang J, Chen Y, Wang X, Pan J, Li G, et al. Overexpression of phosphorylated mammalian target of rapamycin predicts lymph node metastasis and prognosis of chinese patients with gastric cancer. *Clin. Cancer Res. Off. J. Am. Assoc. Cancer Res.* 2009;15:1821–9.
  82. Sakamoto K, Morita K-I, Shimada Y, Omura K, Izumo T, Yamaguchi A. Peripheral odontogenic keratocyst associated with nevoid basal cell carcinoma syndrome: a case report. *Oral Surg. Oral Med. Oral Pathol. Oral Radiol.* 2014;118:e19-23.
  83. Liu S-C, Tsang N-M, Chiang W-C, Chang K-P, Hsueh C, Liang Y, et al. Leukemia inhibitory factor promotes nasopharyngeal carcinoma progression and radioresistance. *J. Clin. Invest.* 2013;123:5269–83.
  84. Souslova V, Townsend PA, Mann J, van der Loos CM, Motterle A, D'Acquisto F, et al. Allele-specific regulation of matrix metalloproteinase-3 gene by transcription factor NFkappaB. *PLoS One.* 2010;5:e9902.
  85. Li R, Ma T, Gu J, Liang X, Li S. Imbalanced network biomarkers for traditional Chinese medicine Syndrome in gastritis patients. *Sci. Rep.* 2013;3:1543.
  86. Urashima M, Hama T, Suda T, Suzuki Y, Ikegami M, Sakanashi C, et al. Distinct effects of alcohol consumption and smoking on genetic alterations in head and neck carcinoma. *PLoS One.* 2013;8:e80828.
  87. Shan M, Zhang X, Liu X, Qin Y, Liu T, Liu Y, et al. P16 and p53 play distinct roles in different subtypes of breast cancer. *PLoS One.* 2013;8:e76408.
  88. Hou X, Li Y, Luo R-Z, Fu J-H, He J-H, Zhang L-J, et al. High expression of the transcriptional co-activator p300 predicts poor survival in resectable non-small cell lung cancers. *Eur. J. Surg. Oncol. J. Eur. Soc. Surg. Oncol. Br. Assoc. Surg. Oncol.* 2012;38:523–30.
  89. Lemos JC, Roth CA, Messinger DI, Gill HK, Phillips PEM, Chavkin C. Repeated stress dysregulates  $\kappa$ -opioid receptor signaling in the dorsal raphe through a p38 $\alpha$  MAPK-dependent mechanism. *J. Neurosci. Off. J. Soc. Neurosci.* 2012;32:12325–36.
  90. Zhou G, Wang J, Zhao M, Xie T-X, Tanaka N, Sano D, et al. Gain-of-function mutant p53 promotes cell growth and cancer cell metabolism via inhibition of AMPK activation. *Mol. Cell.* 2014;54:960–74.
  91. Bedelbaeva K, Snyder A, Gourevitch D, Clark L, Zhang X-M, Leferovich J, et al. Lack of p21 expression links cell cycle control and appendage regeneration in mice. *Proc. Natl. Acad. Sci. U. S. A.* 2010;107:5845–50.
  92. Dong M, Wei H, Hou J-M, Gao S, Yang D-Z, Lin Z-H, et al. Possible prognostic significance of p53, cyclin D1 and Ki-67 in the second primary malignancy of patients with double primary malignancies. *Int. J. Clin. Exp. Pathol.* 2014;7:3975–83.
  93. Evangelou K, Bartkova J, Kotsinas A, Pateras IS, Lontos M, Velimezi G, et al. The DNA damage checkpoint precedes activation of ARF in response to escalating oncogenic stress during tumorigenesis. *Cell Death Differ.* 2013;20:1485–97.
  94. Lantuejoul S, Raynaud C, Salameire D, Gazzeri S, Moro-Sibilot D, Soria J-C, et al. Telomere maintenance and DNA

- damage responses during lung carcinogenesis. *Clin. Cancer Res. Off. J. Am. Assoc. Cancer Res.* 2010;16:2979–88.
95. Lee S-H, Jung Y-S, Chung J-Y, Oh AY, Lee S-J, Choi DH, et al. Novel tumor suppressive function of Smad4 in serum starvation-induced cell death through PAK1-PUMA pathway. *Cell Death Dis.* 2011;2:e235.
  96. Nupponen NN, Paulsson J, Jeibmann A, Wrede B, Tanner M, Wolff JEA, et al. Platelet-derived growth factor receptor expression and amplification in choroid plexus carcinomas. *Mod. Pathol. Off. J. U. S. Can. Acad. Pathol. Inc.* 2008;21:265–70.
  97. Cui W, Cai Y, Wang W, Liu Z, Wei P, Bi R, et al. Frequent copy number variations of PI3K/AKT pathway and aberrant protein expressions of PI3K subunits are associated with inferior survival in diffuse large B cell lymphoma. *J. Transl. Med.* 2014;12:10.
  98. Iyengar S, Clear A, Bödör C, Maharaj L, Lee A, Calaminici M, et al. P110 $\alpha$ -mediated constitutive PI3K signaling limits the efficacy of p110 $\delta$ -selective inhibition in mantle cell lymphoma, particularly with multiple relapse. *Blood.* 2013;121:2274–84.
  99. Kanaji S, Saito H, Tsujitani S, Matsumoto S, Tatebe S, Kondo A, et al. Expression of polo-like kinase 1 (PLK1) protein predicts the survival of patients with gastric carcinoma. *Oncology.* 2006;70:126–33.
  100. Weichert W, Kristiansen G, Schmidt M, Gekeler V, Noske A, Niesporek S, et al. Polo-like kinase 1 expression is a prognostic factor in human colon cancer. *World J. Gastroenterol. WJG.* 2005;11:5644–50.
  101. Sha W, Thompson K, South J, Baron M, Leask A. Loss of PPAR $\gamma$  expression by fibroblasts enhances dermal wound closure. *Fibrogenesis Tissue Repair.* 2012;5:5.
  102. Dumond H, Presle N, Pottier P, Pacquelet S, Terlain B, Netter P, et al. Site specific changes in gene expression and cartilage metabolism during early experimental osteoarthritis. *Osteoarthr. Cartil. OARS Osteoarthr. Res. Soc.* 2004;12:284–95.
  103. Cheng H, Meng J, Wang G, Meng Y, Li Y, Wei D, et al. Skp2 regulates subcellular localization of PPAR $\gamma$  by MEK signaling pathways in human breast cancer. *Int. J. Mol. Sci.* 2013;14:16554–69.
  104. Wullschlegel S, Sakamoto K, Johnstone L, Duce S, Fleming S, Alessi DR. How moderate changes in Akt T-loop phosphorylation impact on tumorigenesis and insulin resistance. *Dis. Model. Mech.* 2011;4:95–103.
  105. Saborowski A, Saborowski M, Davare MA, Druker BJ, Klimstra DS, Lowe SW. Mouse model of intrahepatic cholangiocarcinoma validates FIG-ROS as a potent fusion oncogene and therapeutic target. *Proc. Natl. Acad. Sci. U. S. A.* 2013;110:19513–8.
  106. Miething C, Scuoppo C, Bosbach B, Appelmann I, Nakitandwe J, Ma J, et al. PTEN action in leukaemia dictated by the tissue microenvironment. *Nature.* 2014;510:402–6.
  107. Li Y, Dowbenko D, Lasky LA. AKT/PKB phosphorylation of p21<sup>Cip</sup>/WAF1 enhances protein stability of p21<sup>Cip</sup>/WAF1 and promotes cell survival. *J. Biol. Chem.* 2002;277:11352–61.
  108. Hodeify R, Tarcsafalvi A, Megyesi J, Safirstein RL, Price PM. Cdk2-dependent phosphorylation of p21 regulates the role of Cdk2 in cisplatin cytotoxicity. *Am. J. Physiol. - Ren. Physiol.* 2011;300:F1171–9.
  109. Shin YJ, Kim Y-B, Kim J-H. Protein kinase CK2 phosphorylates and activates p21-activated kinase 1. *Mol. Biol. Cell.* 2013;24:2990–9.
  110. Lyustikman Y, Momota H, Pao W, Holland EC. Constitutive activation of Raf-1 induces glioma formation in mice. *Neoplasia N. Y. N.* 2008;10:501–10.
  111. Nagao S, Yamaguchi T, Kusaka M, Maser RL, Takahashi H, Cowley BD, et al. Renal activation of extracellular signal-regulated kinase in rats with autosomal-dominant polycystic kidney disease. *Kidney Int.* 2003;63:427–37.
  112. Osorio FG, Bárcena C, Soria-Valles C, Ramsay AJ, de Carlos F, Cobo J, et al. Nuclear lamina defects cause ATM-dependent NF- $\kappa$ B activation and link accelerated aging to a systemic inflammatory response. *Genes Dev.* 2012;26:2311–24.
  113. Qu X, Shen L, Zheng Y, Cui Y, Feng Z, Liu F, et al. A signal transduction pathway from TGF- $\beta$ 1 to SKP2 via Akt1 and c-Myc and its correlation with progression in human melanoma. *J. Invest. Dermatol.* 2014;134:159–67.



114. Liu J, Wei X-L, Huang W-H, Chen C-F, Bai J-W, Zhang G-J. Cytoplasmic Skp2 expression is associated with p-Akt1 and predicts poor prognosis in human breast carcinomas. *PLoS One*. 2012;7:e52675.
115. Bao W, Wang H-H, Tian F-J, He X-Y, Qiu M-T, Wang J-Y, et al. A TrkB-STAT3-miR-204-5p regulatory circuitry controls proliferation and invasion of endometrial carcinoma cells. *Mol. Cancer*. 2013;12:155.
116. Wu J, Patmore DM, Jousma E, Eaves DW, Breving K, Patel AV, et al. EGFR-STAT3 signaling promotes formation of malignant peripheral nerve sheath tumors. *Oncogene*. 2014;33:173–80.
117. North PE, Waner M, Mizeracki A, Mihm MC. GLUT1: a newly discovered immunohistochemical marker for juvenile hemangiomas. *Hum. Pathol.* 2000;31:11–22.
118. Rakheja D, Khokhar S, Mitui M, Cost NG. Immunohistochemical expression of GLUT1 and its correlation with unfavorable histology and TP53 codon 72 polymorphism in Wilms tumors. *Pediatr. Dev. Pathol. Off. J. Soc. Pediatr. Pathol. Paediatr. Pathol. Soc.* 2012;15:286–92.
119. Kleeff J, Friess H, Simon P, Susmallian S, Buchler P, Zimmermann A, et al. Overexpression of Smad2 and Colocalization with TGF- $\beta$ 1 in Human Pancreatic Cancer. *Dig. Dis. Sci.* 1999;44:1793–802.
120. Annovazzi L, Mellai M, Caldera V, Valente G, Schiffer D. SOX2 Expression and Amplification in Gliomas and Glioma Cell Lines. *Cancer Genomics - Proteomics*. 2011;8:139–47.
121. Sholl LM, Long KB, Hornick JL. Sox2 expression in pulmonary non-small cell and neuroendocrine carcinomas. *Appl. Immunohistochem. Mol. Morphol. AIMM Off. Publ. Soc. Appl. Immunohistochem.* 2010;18:55–61.
122. Hussenet T, Dali S, Exinger J, Monga B, Jost B, Dembelé D, et al. SOX2 Is an Oncogene Activated by Recurrent 3q26.3 Amplifications in Human Lung Squamous Cell Carcinomas. *PLoS ONE*. 2010;5:e8960.
123. Li F, Cheng Q, Ling X, Stablewski A, Tang L, Foster BA, et al. Generation of a novel transgenic mouse model for bioluminescent monitoring of survivin gene activity in vivo at various pathophysiological processes: survivin expression overlaps with stem cell markers. *Am. J. Pathol.* 2010;176:1629–38.
124. Bollrath J, Pesse TJ, von Burstin VA, Putoczki T, Bennecke M, Bateman T, et al. gp130-mediated Stat3 activation in enterocytes regulates cell survival and cell-cycle progression during colitis-associated tumorigenesis. *Cancer Cell*. 2009;15:91–102.
125. Han X, Li F, Fang Z, Gao Y, Li F, Fang R, et al. Transdifferentiation of lung adenocarcinoma in mice with Lkb1 deficiency to squamous cell carcinoma. *Nat. Commun.* 2014;5:3261.
126. Parris TZ, Kovács A, Aziz L, Hajizadeh S, Nemes S, Semaan M, et al. Additive effect of the AZGP1, PIP, S100A8 and UBE2C molecular biomarkers improves outcome prediction in breast carcinoma. *Int. J. Cancer J. Int. Cancer*. 2014;134:1617–29.
127. Vecchione A, Belletti B, Lovat F, Volinia S, Chiappetta G, Giglio S, et al. A microRNA signature defines chemoresistance in ovarian cancer through modulation of angiogenesis. *Proc. Natl. Acad. Sci. U. S. A.* 2013;110:9845–50.
